## Mice Deficient in Surfactant Protein A (SP-A) and SP-D or in TLR2 Manifest Delayed Parturition and Decreased Expression of Inflammatory and Contractile Genes

Alina P. Montalbano, Samuel Hawgood, and Carole R. Mendelson

Departments of Biochemistry (A.P.M., C.R.M.) and Obstetrics and Gynecology (C.R.M.), North Texas March of Dimes Birth Defects Center, University of Texas Southwestern Medical Center, Dallas, Texas 75390-9038; and Department of Pediatrics (S.H.), University of California, San Francisco, San Francisco, California 94143-0110

Previously we obtained compelling evidence that the fetus provides a critical signal for the initiation of term labor through developmental induction of surfactant protein (SP)-A expression by the fetal lung and secretion into amniotic fluid (AF). We proposed that interactions of AF macrophage (M $\phi$ ) Toll-like receptors (TLRs) with SP-A, at term, or bacterial components, at preterm, result in their activation and migration to the pregnant uterus. Herein the timing of labor in wild-type (WT) C57BL/6 mice was compared with mice homozygous null for *TLR2*, *SP-A*, *SP-D*, or doubly deficient in *SP-A* and *SP-D*. Interestingly, *TLR2*<sup>-/-</sup> females manifested a significant ( $P < 0.001$ ) delay in timing of labor compared with WT as well as reduced expression of the myometrial contraction-associated protein (CAP) gene, connexin-43, and M $\phi$  marker, *F4/80*, at 18.5 d postcoitum (dpc). Whereas in first pregnancies, *SP-A*<sup>-/-</sup>, *SP-D*<sup>-/-</sup>, and *SP-A/D*<sup>-/-</sup> females delivered at term (~19.5 dpc), in second pregnancies, parturition was delayed by approximately 12 h in *SP-A*<sup>-/-</sup> ( $P = 0.07$ ) and in *SP-A/D*<sup>-/-</sup> ( $P < 0.001$ ) females. Myometrium of *SP-A/D*<sup>-/-</sup> females expressed significantly lower levels of IL-1 $\beta$ , IL-6, and CAP genes, connexin-43, and oxytocin receptor at 18.5 dpc compared with WT. *F4/80*<sup>+</sup> AF M $\phi$ s from *TLR2*<sup>-/-</sup> and *SP-A/D*<sup>-/-</sup> mice expressed significantly lower levels of both proinflammatory and antiinflammatory activation markers (e.g. IL-1 $\beta$ , IL-6, ARG1, YM1) compared with gestation-matched WT AF M $\phi$ s. These novel findings suggest that the pulmonary collectins acting via TLR2 serve a modulatory role in the timing of labor; their relative impact may be dependent on parity. (*Endocrinology* 154: 483–498, 2013)

Approximately 15 million babies are born prematurely each year throughout the world (1). Preterm birth, defined as birth at less than 37 wk of gestation, is the leading cause of neonatal morbidity and mortality in developed countries and the second leading cause of death in children under the age of 5 yr worldwide (1). It is estimated that 20–30% of preterm labor is caused by an underlying infection, 25–30% results from premature rupture of membranes, whereas 40–45% is idiopathic (2–4). In the United States, the incidence of preterm birth has risen to

approximately 13% within the last 2 decades (www.marchofdimes.com/peristats); its impact on the health care system is reflected by the approximately \$30 billion spent annually to care for children born prematurely.

Murine models of infection-induced preterm labor have been established in an attempt to extrapolate the critical molecular events and molecules common to term and preterm labor in humans (5, 6). Although infection induced preterm labor and spontaneous labor at term share common signaling mechanisms leading to

ISSN Print 0013-7227 ISSN Online 1945-7170

Printed in U.S.A.

Copyright © 2013 by The Endocrine Society

doi: 10.1210/en.2012-1797 Received August 1, 2012. Accepted October 23, 2012.

First Published Online November 26, 2012

Abbreviations: AF, Amniotic fluid; ARG1, arginase 1; CAP, contraction-associated protein; CCR, chemokine receptor; COX-2, cyclooxygenase 2; C<sub>t</sub>, cycle threshold; CX43, connexin-43; dpc, d postcoitum; LPS, lipopolysaccharide; Ltb, lymphotoxin- $\beta$ ; M $\phi$ , macrophage; MCP, monocyte chemotactic protein; MD-2, molecule that physically complexes with TLR4 on the cell surface and confers LPS responsiveness; NF- $\kappa$ B, nuclear factor- $\kappa$ B; OXTR, oxytocin receptor; PE, phycoerythrin; PRR, pattern recognition receptor; qRT-PCR, quantitative RT-PCR; SP, surfactant protein; TLR, Toll-like receptor; WT, wild type; YM1, chitin 3-like 3.

uterine contraction and birth, the initiating events are distinct. This fact cannot be overlooked because current drug treatments, focused on suppression of uterine contractions, have met with modest success; once labor is initiated, the process is essentially irreversible ([www.marchofdimes.com/peristats](http://www.marchofdimes.com/peristats)).

The signal(s), cellular, and molecular mechanisms that promote labor at term are complex, multifactorial, and redundant. Both term and preterm labor are associated with an inflammatory response (7, 8), exemplified by increased levels of proinflammatory cytokines, including IL-1 $\beta$ , IL-6, IL-8, and TNF- $\alpha$ , in reproductive tissues, amniotic fluid (AF) and maternal serum (9). This occurs upon infiltration of myometrium, cervix, and fetal membranes by neutrophils and macrophages (M $\phi$ s) (10, 11) and results in the activation of proinflammatory transcription factors, such as nuclear factor- $\kappa$ B (NF- $\kappa$ B), which enhance expression of contraction-associated protein (CAP) genes that promote the transformation of the quiescent myometrium to a contractile state. CAP genes include the gap junction protein, connexin-43 (CX43), the oxytocin receptor (OXTR), and cyclooxygenase 2 (COX-2), the critical enzyme in synthesis of contractile prostaglandins (8, 12).

While it is likely that infection associated with chorioamnionitis provides an important inflammatory stimulus for enhanced leukocyte activation and proinflammatory cytokine production leading to preterm labor (13), the signals for the increased inflammatory response associated with labor at term are less well defined. There is increasing evidence to suggest that the fetus may generate signals that contribute to the initiation of labor at term. In this regard, we (14) and others (15) have suggested that augmented surfactant production by the maturing fetal lung may serve as a fetal signal for the initiation of labor.

Pulmonary surfactant, a glycerophospholipid-rich, surface-active lipoprotein produced by alveolar type II cells, is essential for breathing. Surfactant production is developmentally regulated in the fetal lung and is detectable in AF only after approximately 80% of gestation is complete. There are four essentially lung-specific surfactant proteins (SP), SP-A, SP-B, SP-C, and SP-D (16–19). SP-A is the most abundant protein component of surfactant; its developmental regulation in concert with surfactant phospholipid synthesis provides an excellent marker of fetal lung maturity (20, 21). SP-A and SP-D are structurally related glycoproteins that belong to the C-type lectin/collectin superfamily, which also includes mannose-binding protein and conglutinin (19, 22–24). SP-A and SP-D play a critical role in the innate immunity of the lung, whereby interaction of lung collectins with bacteria, viruses, and fungi result either in agglutination or opsonization by immune cells (25). SP-A and SP-D modulate cellular functions and

pulmonary immunity through direct and indirect interactions with a number of different receptors on immune cells (24, 26). These include SP-R210, signal-inhibitory regulatory protein- $\alpha$ , CD91-calreticulin, Toll-like receptor (TLR)-2 and TLR4 (for review, see Ref. 27). Receptor binding can elicit either a proinflammatory or antiinflammatory response, depending on the cell type, identity of the cell surface receptor, presence and type of pathogen or stimulus, orientation of the collectin oligomer, activation state of the cell, and period of ligand exposure (27–32).

We previously reported that the developmental increase in SP-A expression in mouse fetal lung and its secretion into the AF after 17 d postcoitum (dpc) was associated with enhanced expression of IL-1 $\beta$  in AF M $\phi$ s and activation of NF- $\kappa$ B in the maternal uterus (14). Purified SP-A also stimulated IL-1 $\beta$  and NF- $\kappa$ B expression in cultured AF M $\phi$ s. Studies using *Rosa26 Lac-Z* mice revealed that fetal-derived AF M $\phi$  migrate to the uterus with the gestational increase in AF SP-A. Intraamniotic injection of purified SP-A at 15.5 dpc caused preterm delivery of fetuses within 6–24 h. By contrast, injection of an SP-A antibody or NF- $\kappa$ B inhibitor (SN50) into the AF compartment delayed labor by more than 24 h (14). Based on these and other data, it was suggested that AF M $\phi$  interaction with SP-A at term, or with bacterial components at preterm, may initiate changes in M $\phi$  phenotypic properties, resulting in their activation and infiltration of the maternal uterus in which their local production of cytokines, such as IL-1 $\beta$ , contribute to the induction of the inflammatory response by activating the NF- $\kappa$ B pathway. This, in turn, promotes increased uterine contractility by activation of CAP gene expression and/or by blocking progesterone receptor function (14).

Because of the inflammatory hallmarks of term and preterm labor and the reported interactions of SP-A and SP-D with TLR2 and TLR4 (28, 29, 33–36), we postulated involvement of these receptors in the initiation of labor. TLRs, a family of ancient pattern recognition receptors (PRRs) that are expressed in all vertebrate species, recognize specific molecular patterns unique to bacterial, viral, and fungal pathogens. Binding of PRRs to pathogen-associated molecular patterns signal infection and activate molecular cascades that control transcription of a cadre of inflammatory genes responsible for resolving or limiting tissue invasion (37, 38). Upon binding, TLR2 and TLR4 orchestrate a signaling cascade directing the expression of inflammatory genes, such as IL-1, IL-6, IL-8, and TNF- $\alpha$ , chemokines [*i.e.* monocyte chemoattractant protein-1 (MCP-1)], and type I interferons.

In light of the potential role of SP-A in the initiation of labor, its structural and functional relatedness to SP-D,

and SP-A and SP-D interactions with TLRs, it was of interest to define the functional roles of these surfactant proteins and their putative receptors in the timing of labor using gene targeted mice. The current studies were undertaken to determine the following: 1) whether mice deficient in *SP-A*, *SP-D*, and in *SPA/D* manifest parturition defects, 2) whether mice homozygous null for *TLR2* have altered parturition timing, and 3) whether deficiency in the *SP-A/D* or *TLR2* alters the activation profile of AF M $\phi$ s near term and the expression of CAP genes in the pregnant myometrium.

## Materials and Methods

### Mice

All animal studies were conducted in accordance with protocols approved by the Institutional Animal Care and Use Committee of University of Texas Southwestern Medical Center. Cells and tissues were obtained from female mice that were euthanized by inhalation of isoflurane anesthetic (Baxter Healthcare Corp., Guayama, Puerto Rico) and cervical dislocation.

### Timed-pregnant mice from commercial sources

Outbred timed-pregnant CD1/ICR mice were purchased from Harlan Laboratories (Harlan USA, Houston, TX). Mice were time mated by placing 8- to 10-wk-old males and females together between 1700 and 0700 h. Pregnancy was determined by the presence of a vaginal plug the following morning; gestational age was designated at that time as 0.5 dpc. Pregnant mice were received either at 12.5 or 14.5 dpc and housed under pathogen-free conditions during which they were maintained on a 12-h light, 12-h dark cycle with access to a standard pellet chow.

### Timing of labor in gene-targeted and wild-type (WT) B6 mice

To examine the effects of deficiencies in *SP-A* (*SP-A*<sup>-/-</sup>), *SP-D* (*SP-D*<sup>-/-</sup>), *SP-A* and *SP-D* (*SP-A/D*<sup>-/-</sup>), and *TLR2* (*TLR2*<sup>-/-</sup>) on the timing of labor, homozygous knockout breeding pairs were housed together overnight and separated in the morning (designated 0.5 dpc). The time of labor was documented upon delivery of the first pup or by the presence of a litter. Timing of parturition in WT C57BL/6 (B6) mice (Mouse Breeding Core Facility, University of Texas Southwestern) was carried out in a similar fashion. First pregnancies were generated by breeding virgin-female mice to genetically like males. Second pregnancies were generated in mice previously bred to genetically like males. All mice were housed under pathogen-free conditions, maintained on a 12-h dark, 12-h light cycle, and allowed free access to a standard pellet chow.

### *SP-A*, *SP-D*, and *SP-A/D* null mice

Mice homozygous for targeted disruption of the *SP-A* (39), *SP-D* (40) or both *SP-A/D* genes (41) were used. It should be noted that because *SP-A* and *SP-D* genes lie approximately 60 kb apart on mouse chromosome 14, they were sequentially targeted in embryonic stem cells to create the double knockout mice (41). Deletion of

*SP-A* and *SP-D* genes was confirmed by PCR analysis of tail DNA using *SP-A* and *SP-D* primers as follows: *SP-A*, forward, 5'-GTGG GGTGGGATTAGATAAATGC-3' (neomycin cassette detection); reverse, 5'-GCATTAGACGACAGAAGCTCCAGCC-3'; reverse, 5'-TACTGAGAGATGTGTGCTTGGTGAG-3'; *SP-D*, forward, 5'-TGGTTTCTGAGATGGAGTCGTG-3'; reverse, 5'-TGGGGC AGTGGATGGAGTGTGC-3'; reverse, 5'-GTGGATGTGGAA TGTGTGCGAG-3' (neomycin cassette detection). Amplification temperatures were 30 sec at 94 C, 30 sec at 63 C, and 31 sec at 72 C for 30 cycles after an initial denaturing step of 1 min at 94 C.

### *TLR2* null mice

Mice homozygous for targeted disruption of the *TLR2*<sup>tm/kir</sup> gene were obtained from Jackson Laboratories (Bar Harbor, ME). Deletion of *TLR2* was confirmed by PCR analysis of tail DNA using primers for *TLR2*, forward, 5'-ACGAGCAAGATCAACAG-GAGA-3'; reverse, 5'-CTTCCTGAATTTGTCCAGTACA-3'; and reverse, 5'-TAAGGGCCAGCTCATTCTCC-3' (neomycin cassette detection). Amplification times/temperatures were 30 sec at 94 C, 30 sec at 63 C, and 90 sec at 68 C for 35 cycles after an initial denaturing step of 3 min at 94 C.

### Isolation of murine myometrium and fetal lungs at 18.5 dpc

Myometrium and fetal lungs were collected from timed-pregnant mice at approximately 1000 h on d 18.5 of the first pregnancy. Maternal myometrium was isolated by removing all fetal-derived tissues followed by gentle scraping and blotting of the endometrial layer. Intact fetal lungs were harvested on ice. All tissues were rinsed in ice-cold 1 $\times$  PBS, flash frozen in liquid nitrogen, and stored at -80 C until analysis.

### Amniotic fluid cell isolation and purification

#### *Murine AF cell isolation*

Amniotic fluid M $\phi$ s were isolated from 15.5, 17.5, and 18.5 dpc mice. Uteri were exposed and AF from individual amniotic sacs was carefully aspirated, avoiding maternal blood contamination, using a 20-gauge needle and a 1.0-ml syringe containing 0.1 ml of PBS (pH 7.4) supplemented with fetal bovine serum. The AF contents obtained from all individual sacs from a single pregnant mouse (*e.g.* *n* = 1) were pooled and incubated with hyaluronidase (SEIKAGAKU Corp., 0.2 U/ml) for 10 min at 37 C, followed by centrifugation for 5 min at 600  $\times$  *g* at 4 C. We found that because of increased AF viscosity near term, incubation with hyaluronidase was extremely important for efficient isolation of M $\phi$  at late gestation. Limulus amebocyte lysate assay (Lonza, Switzerland) was used to assay for the presence of Gram-negative bacterial endotoxin and determine the lipopolysaccharide (LPS) concentration in the 1:500 hyaluronidase dilution used to incubate AF cells. Results demonstrated no detectable LPS at the dilution used to incubate AF cells. Red blood cells were removed by treatment with 400  $\mu$ l of 1 $\times$  red blood cell lysis buffer (eBioscience, San Diego, CA) for 4 min at room temperature. The total cell number contained within each single-cell suspension was determined using a hemacytometer and trypan blue (1:1). The cellular populations with greater than 95% viability were used for further analysis.

## Flow cytometry and cell sorting

For identification of the AF M $\phi$  population, cells from AF single-cell suspensions were incubated on ice for 10 min with rat-antimouse monoclonal antibody 2.4G2 (BD Bioscience, San Diego, CA) to block Fc-mediated binding of antibodies to mouse Fc $\gamma$ III/II receptors. Cells were washed twice using flow cytometry staining buffer (eBioscience) and stained for 30 min at 4 C using the following antibodies (eBioscience): anti-F4/80-phycoerythrin (anti-F4/80-PE), allophycocyanin (APC) antimouse CD11b (integrin  $\alpha_M$ , Mac-1a), phycoerythrin (PE) antimouse TLR2, and PE antimouse TLR4/MD-2 (molecule that physically complexes with TLR4 on the cell surface and confers LPS responsiveness). Samples were washed, fixed in 2% paraformaldehyde (Sigma Aldrich, St. Louis, MO), and analyzed using the FACSCalibur (BD Bioscience). A forward/side-scatter live gate was set and approximately 50,000–100,000 events were collected per sample. Analysis was carried out using FlowJo analysis software (Tree Star Inc., Ashland, OR) or Cellquest Pro analysis software (BD Bioscience). For isolation of AF M $\phi$ s, F4/80-stained populations were sorted immediately after the staining by FACSaria (BD Bioscience). Greater than 98% sample purity was consistently achieved as confirmed by the post-sort.

## mRNA isolation and first-strand cDNA synthesis

Total RNA was extracted from myometrial tissues using TRIzol reagent (Invitrogen, Carlsbad, CA). Tissues were mechanically dissociated in QIAzol (QIAGEN Inc., Valencia, CA). Total RNA from myometrium was isolated using the QIAGEN RNeasy Mini Kit (QIAGEN) in conjunction with the QIAcube (QIAGEN). Superscript III reverse transcriptase system (Invitrogen) was used to transcribe 2  $\mu$ g of deoxyribonuclease I-treated RNA (Invitrogen) as outlined by the manufacturer. RNA isolation from F4/80<sup>+</sup> AF M $\phi$ s was carried out using TRIzol reagent and the one-step method of Chomczynski and Sacchi (42). RNA integrity was verified using Experion high-sensitivity chips (Bio-Rad Laboratories, Hercules, CA), and cDNA was synthesized from 500 ng of RNA using the iScript cDNA synthesis kit (Bio-Rad Laboratories).

## Quantitative real-time PCR and data analysis

Quantitative real-time PCR was performed using the Bio-Rad CFX384 real-time system (Bio-Rad Laboratories), SYBR Green PCR master mix (Applied Biosystems, Branchburg, NJ) and Taqman PCR master mix, No AmpErase UNG (Applied Biosystems). Taqman primers for IL-1 $\beta$  (Mm01336189\_m1), IL-6 (Mm00446190\_m1), arginase 1 (ARG1) (Mm00475990\_m1), chitin 3-like 3 (YM1) (Mm00657889\_mH), F4/80 (Mm00802529\_m1), and ribosomal protein, large, PO (m36B4) (Mm0197446190\_gh) were obtained from Applied Biosystems. Primers for CX43, OXTR, and m36B4 were as follows: CX43, forward, 5'-TCCAAGGAGTTCACCACTT-3', and reverse, 3'-TGGAGTAGGCTTGGACCTTG-5'; OXTR, forward, 5'-TTCTTCGTGCAGATGTGGAG-3', and reverse, 3'-TGTAGATCCATGGGTTGC AG-5'; m36B4, forward, 5'-CACTGGTCTAGGACCCGAGAAG-3', and reverse, 3'-GGTGCCTCTGGAGATTTTCG-5'. Optimal quantitative PCR conditions were standardized for each product. Reactions were performed in triplicate. The comparative cycle threshold ( $C_t$ ) method was used to quantify gene expression (43). Normalized  $\Delta C_t$  values were calculated using endogenous house-

keeping gene m36B4. Fold-change was calculated using the  $2^{-\Delta\Delta C_t}$  method.

## SuperArray RT<sup>2</sup> profiler array plate

SuperArray analysis of 84 gene transcripts associated with the inflammatory response was performed using the mouse inflammatory RT<sup>2</sup> profiler PCR array plate PAMM-011E (SuperArray, Fredrick, MD) following the manufacturer's instructions. Briefly, cDNA amplification was performed using the RT<sup>2</sup> first strand kit (SuperArray). A total of 25  $\mu$ l of PCR mixture, containing cDNA and SYBR Green/ROX PCR master mix solution (SuperArray), was loaded into each well of the PCR array. Two-step cycling conditions were as follows: one cycle for 10 min at 95 C followed by 15 sec at 95 C and 1 min at 60 C for 40 cycles. Results were analyzed using SuperArray's RT<sup>2</sup> Profiler PCR array data analysis software (www.sabiosciences.com/pcrarraydataanalysis.php). The average of five housekeeping genes (*Gusb*, *Hrpt1*, *Hsp90ab1*, *Gapdh*, *actin b*) was used to normalize sample  $C_t$  values. Time-matched AF M $\phi$  from WT B6 mice served as calibrator or reference sample.  $C_t$  values above 35 were interpreted as below detectable limits. Analysis was based on the comparative  $C_t$  method. The Student's *t* test was used to determine statistical significance.

## Statistical analysis

GraphPad Prism 5.0 software (GraphPad Prism, San Diego, CA) was used to determine statistical significance between groups via unpaired one-tailed Student's *t* test and by one-way ANOVA, followed by Tukey's analysis for determining differences among multiple groups. The data are expressed as mean  $\pm$  SEM.  $P < 0.05$  was considered to be statistically significant.

## Results

### SP-A/D double deficiency in mice results in delayed labor

To define the roles of SP-A and SP-D in the timing of parturition, female mice singly deficient in SP-A (SP-A<sup>-/-</sup>), SP-D (SP-D<sup>-/-</sup>), or doubly deficient in SP-A and -D (SP-A/D<sup>-/-</sup>) were bred to genetically like males and the time to labor was assessed. During first pregnancies, no difference in the time to labor was evident among SP-A<sup>-/-</sup> (19.4  $\pm$  0.07 dpc; n = 29), SP-D<sup>-/-</sup> (19.4  $\pm$  0.12 dpc; n = 11), SP-A/D<sup>-/-</sup> (19.55  $\pm$  0.08 dpc; n = 20) mice and WT C57BL/6 (B6) controls (19.50  $\pm$  0.05; n = 25) (Fig. 1A). A scatter plot of these data show similar trends in parturition timing across all genotypes (Fig. 1B). By contrast, during second pregnancies, a statistically significant delay in the time to parturition was evident in SP-A/D<sup>-/-</sup> mice (20.20  $\pm$  0.16 dpc; n = 23) ( $P < 0.001$ ) compared with their WT B6 counterparts (19.5  $\pm$  0.08 dpc; n = 10) (Fig. 1C). A similar delay was observed during third pregnancies as the average time to labor was 20.15 dpc (n = 4, data not shown). It is important to note that although the protracted time to labor in second pregnancies of SP-A<sup>-/-</sup> mice (20.02  $\pm$



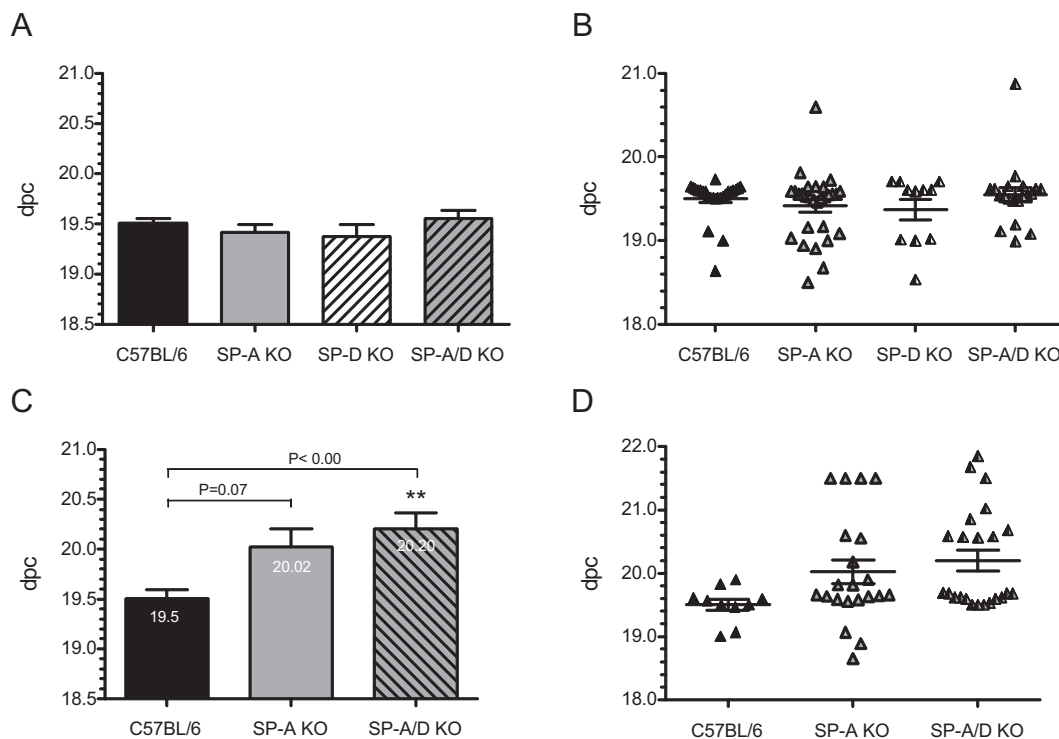

**FIG. 1.** SP-A and -SP-D doubly deficient mice manifest a significant delay in labor during second pregnancies. Timing of labor was assessed during first (A and B) and second (C and D) pregnancies in C57BL/6 (B6) WT mice and mice homozygous null for *SP-A*, *SP-D*, and for *SP-A/SP-D* genes. A, During first pregnancies B6 WT ( $n = 25$ ), *SP-A*<sup>-/-</sup> ( $n = 29$ ), *SP-D*<sup>-/-</sup> ( $n = 11$ ), and *SP-A/D*<sup>-/-</sup> ( $n = 20$ ) females bred to genetically like males delivered normally at  $19.5 \pm 0.05$ ,  $19.4 \pm 0.07$ ,  $19.4 \pm 0.12$ , and  $19.55 \pm 0.08$  dpc, respectively. B, Scatter plots of the time to parturition illustrate similar parturition timing across all strains. C, During second pregnancies, *SP-A*<sup>-/-</sup> females bred to like males manifested a delay, albeit not insignificant ( $P = 0.07$ ) in the average time to labor ( $20.02 \pm 0.19$  dpc,  $n = 21$ ). Parturition was significantly (\*\*,  $P < 0.001$ ) delayed in *SP-A/D*<sup>-/-</sup> females ( $20.20 \pm 0.16$  dpc,  $n = 23$ ) bred to like males compared with B6 WT mice ( $19.5 \pm 0.09$  dpc;  $n = 10$ ). Gestational length is listed as dpc. Values are expressed as the mean  $\pm$  SEM of gestation length. Statistically significant differences were calculated by one-way ANOVA.

0.18,  $n = 21$ ) did not reach statistical significance ( $P = 0.07$ ), dysregulated parturition was evident in the wide variation of delivery times shown in the scatter plot (Fig. 1D). Furthermore, an increased incidence of dystocia among *SP-A*<sup>-/-</sup> mice during second pregnancies was confirmed by necropsy of mothers manifesting delayed labor and apparent distress. Pups delivered late by *SP-A*<sup>-/-</sup> and *SP-A/D*<sup>-/-</sup> mothers had anatomical features of enhanced maturity (*i.e.* whiskers, nails, and increased crown to rump length) and were significantly heavier than WT pups delivered at term (Table 1). To assess whether the observed delays in parturition were associated with defects in fecun-

dity, we compared litter size among *SP-A*<sup>-/-</sup>, *SP-A/D*<sup>-/-</sup>, and WT B6 mice during second pregnancies. We found the average litter size across all genotypes to be similar (Table 1) and in agreement with published data for C57BL/6 mice (44). Litter viability was unaffected by the ablation of *SP-A* and/or *SP-D* genes. *SP-D*<sup>-/-</sup> mice were not further studied in second pregnancies. To determine whether age influences parturition timing, the age and time of labor among *SP-A*<sup>-/-</sup>, *SP-A/D*<sup>-/-</sup>, and WT B6 mice during first and second pregnancies were analyzed. Importantly, age had no significant influence on the time to labor for any of these genotypes (Supplemental Fig. 1, published on The

**TABLE 1.** Effects of *SP-A* and *SP-A/SP-D* deficiency on parturition timing, pups per litter and pup weight

| Strain                       | Gestation time (d)                         | Pups/litter                  | Weight/pup (g)                           |
|------------------------------|--------------------------------------------|------------------------------|------------------------------------------|
| C57BL/6                      | $19.50 \pm 0.08$ ( $n = 10$ )              | $8.00 \pm 0.28$ ( $n = 24$ ) | $1.264 \pm 0.08$ ( $n = 49$ )            |
| <i>SP-A</i> <sup>-/-</sup>   | $20.02 \pm 0.18$ ( $n = 21$ )              | $8.30 \pm 0.58$ ( $n = 18$ ) | $1.55 \pm 0.12$ ( $n = 5$ ) <sup>a</sup> |
| <i>SP-A/D</i> <sup>-/-</sup> | $20.20 \pm 0.16$ ( $n = 23$ ) <sup>b</sup> | $7.72 \pm 0.42$ ( $n = 20$ ) | $1.58 \pm 0.03$ ( $n = 8$ ) <sup>a</sup> |

Parturition length was assessed as dpc, and data are presented as the mean  $\pm$  SEM. The total number of mice analyzed in each group is indicated in parentheses. Average litter size reflects the number of live and dead pups born to individual mothers. Only intact newborn pups were weighed to determine the average weight of pups per genotype. Weight is reported in grams. Statistically significant differences were determined using the Student's *t* test.

<sup>a</sup>  $P < 0.05$ .

<sup>b</sup>  $P < 0.001$ .

Endocrine Society's Journals Online web site at <http://endo.endojournals.org>). Thus, parity, not age, influenced the time to labor in SP-A/D-deficient mice but had no effect on their WT counterparts.

### Delayed parturition in SP-A and SP-D doubly deficient mice is associated with decreased expression of myometrial inflammatory cytokines and CAP genes

Proinflammatory cytokines, such as IL-1 $\beta$  and IL-6, contribute to the onset of uterine contractility, leading to term and preterm labor. This occurs, in part, via activation of NF- $\kappa$ B, which in turn, increases expression of COX-2 to stimulate prostaglandin synthesis and expression of CAP genes, such as OXTR and CX43 (8, 45–48). To investigate the basis for the delay in labor observed during SP-A/D<sup>-/-</sup> second pregnancies, we compared expression of IL-1 $\beta$  and IL-6 in myometrial tissues isolated from SP-A/D<sup>-/-</sup> and WT B6 mice at 18.5 dpc by quantitative RT-PCR (qRT-PCR). Analysis revealed significantly lower levels of IL-1 $\beta$  ( $P < 0.0001$ ;  $n = 8$ ) and IL-6 ( $P < 0.001$ ;  $n = 8$ ) expression in SP-A/D<sup>-/-</sup> mice compared

with B6 WT mice (Fig. 2, A and B). qRT-PCR also revealed a coordinate reduction in CX43 ( $P < 0.05$ ;  $n = 7$ ) and in OXTR ( $P < 0.05$ ;  $n = 7$ ) (Fig. 2, C and D) mRNA expression in the doubly deficient mice compared with WT. Immunoblot analyses of CX43 protein in second pregnancy myometrial tissues revealed a coordinate and comparable reduction (~60%) in CX43 protein in SP-A/D knockout mice compared with WT B6 ( $P < 0.05$ ) (Supplemental Fig. 2).

### Amniotic fluid M $\phi$ s isolated from SP-A/D null mice exhibit alterations in expression of proinflammatory (M1) and antiinflammatory (M2) M $\phi$ activation markers at 18.5 dpc

We previously suggested that SP-A may act via TLRs to stimulate and activate AF M $\phi$ s to a proinflammatory state near term (14). To investigate the consequences of SP-A/D deficiency on AF M $\phi$  activation, fluid was harvested from amniotic sacs of SP-A/SP-D null and B6 WT fetuses at 18.5 dpc. F4/80<sup>+</sup> AF M $\phi$ s were isolated by FACS Aria (BD Bioscience) and analyzed for expression of proinflammatory/classical (M1) and antiinflammatory/alternative (M2) ac-

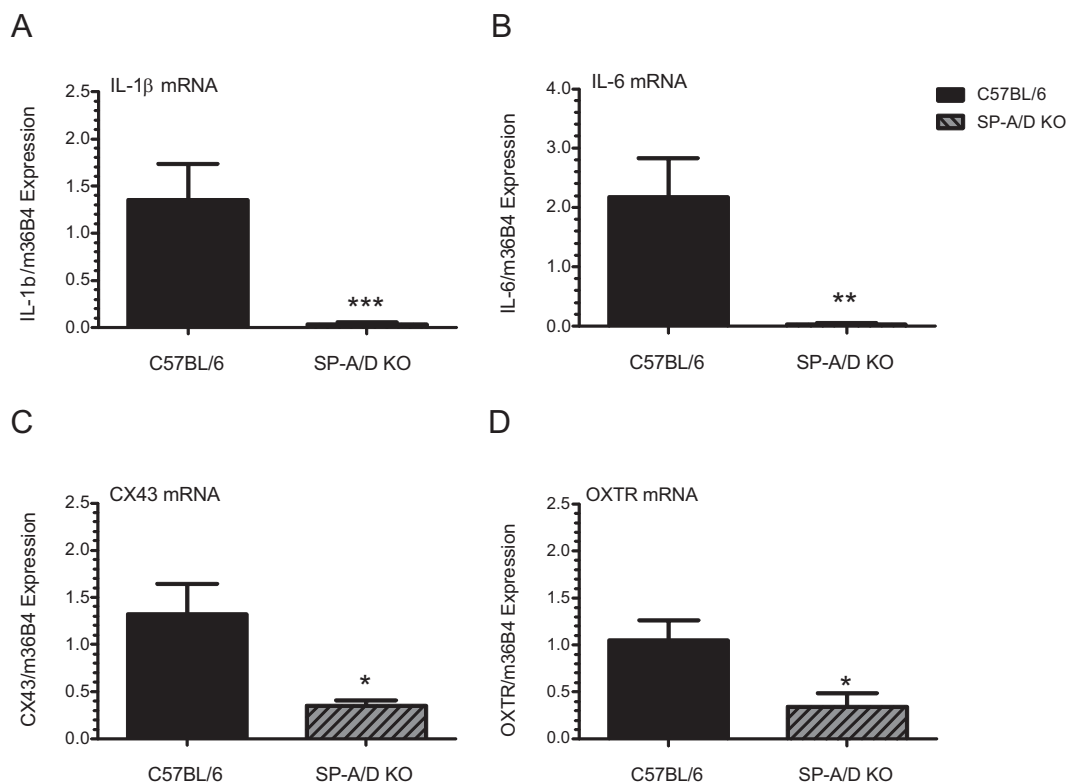

**FIG. 2.** Delayed parturition in SP-A/D doubly deficient mice is associated with reduced inflammatory and contraction-associated protein gene expression in myometrial tissues. SP-A/D knockout and B6 virgin-females were mated to genetically like males and allowed to deliver normally. Second pregnancies were generated in the same manner as described above. Myometrial tissues were harvested at 18.5 dpc from SP-A/D knockout and WT B6 mice and myometrial tissues were analyzed by qRT-PCR for IL-1 $\beta$  (A), IL-6 (B), CX43 (C), and OXTR (D) mRNA expression. Data were normalized to m36B4 housekeeping gene expression. Myometrial levels of IL-1 $\beta$  (A) ( $P < 0.0001$ ;  $n = 8$ ), IL-6 (B) ( $P < 0.001$ ;  $n = 8$ ), (C) CX43 ( $P < 0.05$ ;  $n = 7$ ), and (D) OXTR ( $P < 0.05$ ;  $n = 7$ ) mRNA were significantly decreased at 18.5 dpc in SP-A/D knockout mice compared with WT B6 controls. Data are the mean  $\pm$  SEM of each mRNA relative to m36B4 expression. Data were analyzed using the Student's  $t$  test. \*,  $P < 0.05$ ; \*\*,  $P < 0.001$ ; \*\*\*,  $P < 0.0001$ .

tivation markers by qRT-PCR. Interestingly, we observed that the M1 marker, IL-1 $\beta$ , was significantly ( $P < 0.001$ ;  $n = 4$ ) down-regulated in AF M $\phi$  from SP-A/D-deficient fetuses, compared with B6 WT (Fig. 3A). Whereas the M1 marker, IL-6 (Fig. 3B), was unaffected by SP-A/D deficiency ( $P < 0.6$ ;  $n = 3$ ), levels of the M2 markers, ARG1 ( $P < 0.001$ ;  $n = 5$ ) (Fig. 3C) and YM1 ( $P < 0.05$ ;  $n = 4$ ) (Fig. 3D) were significantly decreased in AF M $\phi$ s from SP-A/D-deficient fetuses, compared with B6 WT. Although we recognize the possible limitations of exclusively analyzing mRNA expression in these cells, analyses of protein levels in amniotic fluid M $\phi$  was not possible in these studies or in those described below because of the very limited amounts of M $\phi$  protein obtained.

### Expression of TLR2 and TLR4/MD-2 increases significantly in CD11b<sup>+</sup> AF M $\phi$ s during late gestation

We next sought to characterize expression of TLR2 and TLR4/MD-2, known to bind the bacterial cell wall com-

ponents, peptidoglycan (49), and LPS (50), respectively, in AF M $\phi$ s during late gestation when SP-A expression is up-regulated in the fetal lung. Whereas TLR2 and TLR4 expression in adult M $\phi$ s is well characterized, expression of these PRRs in fetal AF M $\phi$ s near term was heretofore unknown. To analyze TLR2 and TLR4/MD-2 expression in AF M $\phi$  during late gestation, AF cells from all amniotic sacs of each pregnant CD1 mouse were pooled at 15.5, 17.5, and 18.5 dpc and stained using CD11b, a M $\phi$  marker, in combination with antibodies against TLR2 or TLR4/MD-2. Cells were examined by flow cytometry. Expression of TLR2 ( $n = 11$  samples from 11 timed pregnant mice) and TLR4/MD-2 ( $n = 9$  samples from 9 timed pregnant mice) in CD11b<sup>+</sup> AF M $\phi$  at 15.5 dpc was readily detectable. A significant increase in cell surface expression of both TLR2 ( $P < 0.0001$ ;  $n = 18$  samples from 18 timed pregnant mice) and TLR4/MD-2 ( $P < 0.0001$ ;  $n = 16$  samples from 16 timed pregnant mice) was observed at 17.5 dpc. Importantly, this increase coincides with the

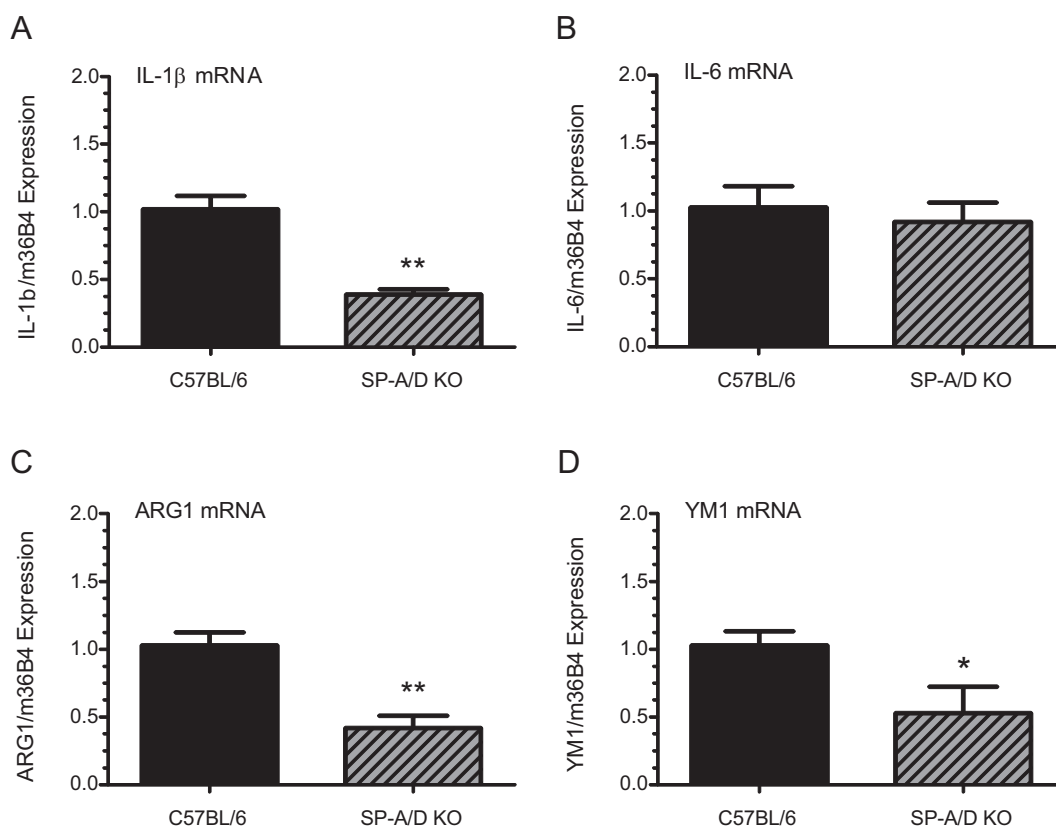

**FIG. 3.** AF M $\phi$ s isolated from SP-A/D-deficient mice express decreased levels of M1 and M2  $\phi$  activation markers near term. F4/80<sup>+</sup> AF M $\phi$ s isolated from SP-A/D knockout mice during second pregnancies at 18.5 dpc were analyzed for the expression of M1 and M2 markers. Pooled M $\phi$  mRNA (500 ng) from each timed-pregnant mouse was reverse transcribed, and expression of M1 and M2 markers was assayed by qRT-PCR. The  $C_t$  values were normalized to m36B4 and calculated as fold change over B6 WT controls using  $\Delta\Delta C_t$ . Analysis revealed significantly lower levels of the proinflammatory (M1) activation marker IL-1 $\beta$  (A) ( $P < 0.001$ ;  $n = 4$ ) and comparable levels of IL-6 mRNA (B) ( $P = 0.6$ ;  $n = 3$ ) in SP-A/D knockout AF M $\phi$  compared with WT. Expression of the antiinflammatory activation (M2) markers ARG 1 (C) ( $P < 0.001$ ;  $n = 5$ ) and YM1 (D) ( $P = 0.049$ ;  $n = 4$ ) were significantly reduced in SP-A/D knockout AF M $\phi$  compared with WT. Values are reported as mean  $\pm$  SEM. Statistically significant differences were calculated by the Student's  $t$  test. \*,  $P < 0.05$ , \*\*,  $P < 0.001$ .

developmental induction of SP-A expression by fetal lung and secretion into AF (14). Augmented levels of TLR2 ( $P < 0.0001$ ;  $n = 20$  samples from 20 timed pregnant mice) and TLR4/MD-2 complex ( $P < 0.0001$ ;  $n = 19$  samples from 19 timed pregnant mice) remained elevated through 18.5 dpc (Fig. 4, A and B).

### TLR2-deficient mice manifest a significant delay in the timing of labor that is associated with decreased expression of CX43 and F4/80 mRNA in the gravid myometrium and with significantly lower levels of SP-A and SP-D gene expression in fetal lung

TLR2 and TLR4 are expressed in numerous reproductive tissues including the decidua (51) and myometrium (52). In studies of human myometrial biopsies, TLR2 mRNA and protein were found to be significantly increased in tissues from laboring *vs.* nonlaboring women, whereas TLR4 protein levels remain unchanged (52, 53). Notably, SP-A has been reported to enhance expression of TLR2, but not TLR4, during differentiation of human monocytes to M $\phi$ s (54). Consequently, we decided to focus on the potential role of TLR2 in murine parturition. The time to labor was assessed in TLR2<sup>-/-</sup> mice during first pregnancies. Compared with WT B6 ( $19.5 \pm 0.02$  dpc,  $n = 25$ ), TLR2<sup>-/-</sup> ( $19.93 \pm 0.61$  dpc) mice manifested a significant delay ( $P < 0.001$ ;  $n = 20$ ) in the timing of labor in first pregnancies (Fig. 5A). A scatter plot of these data reveals the wide range in the time to labor observed in the mutant mice (Fig. 5B). Accordingly, mice manifesting delayed labor also delivered pups whose av-

erage weight was significantly greater ( $P < 0.0001$ ) than WT littermates (Fig. 5C). qRT-PCR analysis of SP-A and SP-D mRNA levels in fetal lungs at 18.5 dpc indicated a pronounced decrease in SP-A ( $P < 0.05$ ;  $n = 12$ ) and SP-D ( $P = 0.005$ ;  $n = 12$ ) expression in TLR2-deficient fetuses compared with WT B6 pups (Fig. 5, D and E).

Analysis of myometrial tissues from TLR2-deficient females at 18.5 dpc revealed a trend toward increased expression of IL-1 $\beta$  ( $P = 0.06$ ;  $n = 13$ ) and no difference in IL-6 mRNA ( $P = 0.1$ ;  $n = 10$ ), compared with WT mice (Fig. 6, A and B). Notably, these cytokines are not downstream of TLR2. On the other hand, expression of the CAP gene, CX43, was significantly decreased ( $P < 0.05$ ;  $n = 13$ ) in TLR2 null *vs.* WT mice (Fig. 6C), whereas no significant difference in OXTR ( $P = 0.33$ ;  $n = 10$ ) mRNA levels (Fig. 6D) was detected. Interestingly, expression of the M $\phi$ -specific marker, F4/80, was significantly decreased in the myometrium of TLR2<sup>-/-</sup> mice compared with WT at 18.5 dpc (Fig. 6E).

### AF M $\phi$ s isolated from TLR2<sup>-/-</sup> mice exhibit aberrant changes in expression of proinflammatory and antiinflammatory activation markers at 18.5 dpc compared with B6 WT mice

To investigate the consequences of TLR2 deficiency in AF M $\phi$  activation, F4/80<sup>+</sup> AF M $\phi$ s were isolated at 18.5 dpc by FACSAria (BD Bioscience), and a SuperArray qRT-PCR-based inflammatory array was used to profile inflammation-associated gene transcription. Of the 84 genes assayed, 32 showed a significant decrease of 2-fold or greater ( $P < 0.05$ ) compared with WT M $\phi$  populations

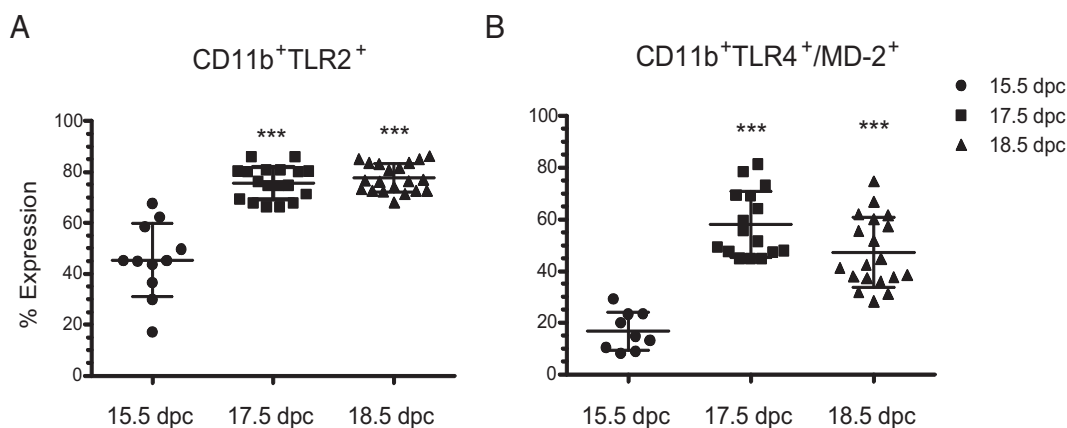

**FIG. 4.** Surface expression of TLR2 and TLR4/MD-2 is up-regulated in mouse AF M $\phi$ s near term. AF M $\phi$ s isolated from 15.5, 17.5, and 18.5 dpc CD1 mice were double stained for CD11b in combination with TLR2 or TLR4/MD-2. Expression by CD11b<sup>+</sup> AF M $\phi$ s was assessed by flow cytometry using a FACSCalibur (Becton Dickinson). A live cell gate was set based on forward and side-scatter characteristics. A second gate was set based on previously established CD11b<sup>+</sup>F4/80<sup>+</sup> double-positive AF M $\phi$  populations at 15.5, 17.5, and 18.5 dpc. The number of events collected per sample ranged from 50,000 to 100,000. The CD11b<sup>+</sup> population was analyzed for expression of TLR2 and TLR4/MD-2 using FlowJo (Tree Star) and Cellquest Pro software (BD Bioscience). The data are presented as the percentage of CD11b<sup>+</sup> M $\phi$  that express TLR2 and TLR4/MD-2 receptors. (A) TLR2 ( $P < 0.0001$ ;  $n = 18$ ) and (B) TLR4/MD-2 ( $P < 0.0001$ ;  $n = 16$ ) cell surface expression was significantly up-regulated between 15.5 and 17.5 dpc and remained elevated through 18.5 dpc ( $P < 0.0001$ ;  $n = 19$ ). Statistical significance between 15.5 dpc and later time points was determined by one-way ANOVA followed by Tukey's analysis. The data are expressed as mean  $\pm$  SEM. \*\*\*,  $P < 0.0001$ .



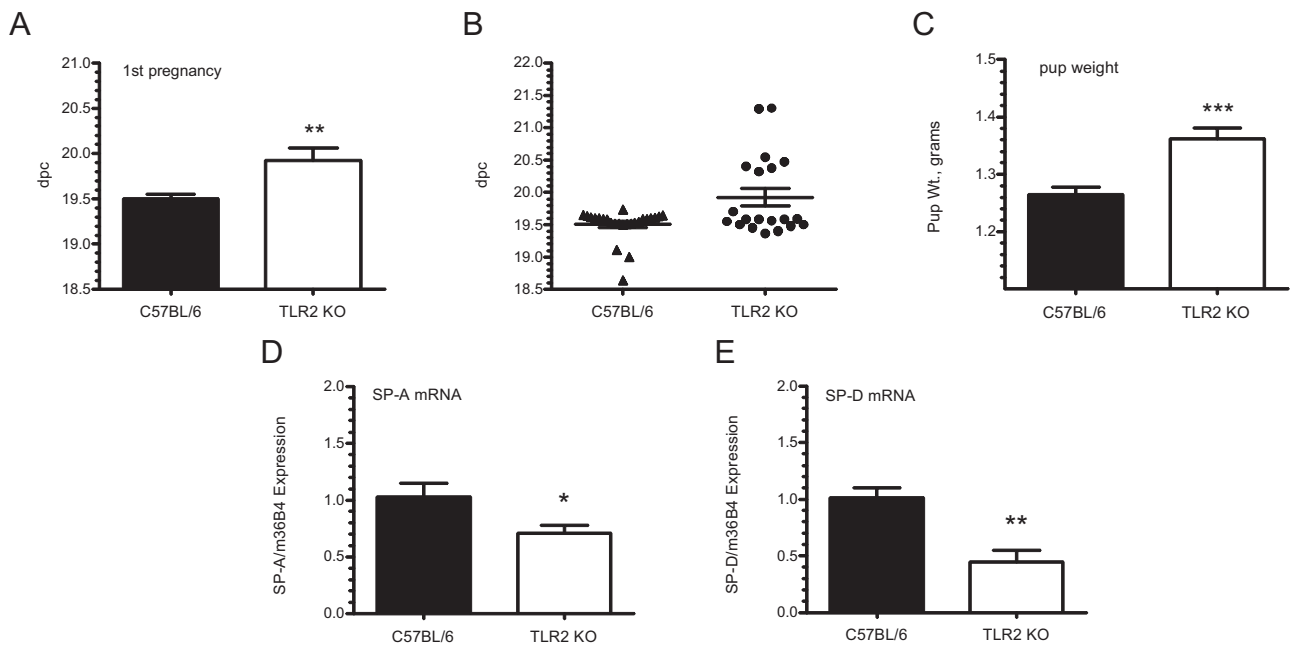

**FIG. 5.** TLR2-deficient mice manifest a significant delay in labor. Virgin  $TLR2^{-/-}$  and B6 WT mice were bred to genetically like males and parturition timing was assessed in first pregnancies as d postcoitum (dpc). A,  $TLR2^{-/-}$  mice manifested a statistically significant delay in parturition timing ( $19.93 \pm 0.14$  dpc) ( $P < 0.001$ ;  $n = 20$ ) compared with WT B6 ( $19.5 \pm 0.05$  dpc,  $n = 25$ ). B, Scatter plot of the parturition data illustrates the degree of dysregulated parturition. C,  $TLR2^{-/-}$  pups delivered by mothers that manifested delayed labor weighed significantly more than those born to B6 WT mothers at 19.5 dpc. Expression of SP-A (D) and SP-D (E) mRNA levels in  $TLR2^{-/-}$  and B6 WT fetal lungs was evaluated at 18.5 dpc by qRT-PCR. Transcript expression was normalized to m36B4 expression and the comparative  $C_t$  ( $\Delta\Delta C_t$ ) method was used to quantify expression levels. Results are expressed as fold change relative to gestation-matched WT controls. mRNA levels of (D) SP-A ( $P < 0.05$ ;  $n = 12$ ) and (E) SP-D ( $P = 0.005$ ;  $n = 12$ ) were significantly lower in fetal lungs of  $TLR2^{-/-}$  pups. Values are expressed as mean  $\pm$  SEM. Statistically significant differences were calculated by the Student's  $t$  test. \*,  $P < 0.05$ , \*\*,  $P < 0.005$ , \*\*\*,  $P < 0.0001$ .

(Table 2). The top five down-regulated genes in cells isolated from TLR2-deficient mice included *Ccl19* (21-fold), *IL-13* (6-fold), *IL-17b* (5.5-fold), lymphotoxin- $\beta$  (*Ltb*; 5.5-fold), and *Ccr10* (5.4-fold). *Ccl19*/ELC/MIP-3 $\beta$  binds chemokine receptor (CCR)-7 and functions as a potent chemoattractant in T and B cell and mature dendritic cell recruitment (55). IL-13, produced primarily by activated Th2 cells, acts on a variety of cell types and is implicated as a key mediator in the pathogenesis of allergic inflammation (56). IL-17b stimulates release of proinflammatory cytokines from macrophages and monocytic cell lines. *Ltb*, a member of the TNF superfamily, plays a critical role in immune system development, regulation, and inflammation (57), whereas CCR10 binds CCL27 to stimulate intracellular calcium and promote chemotaxis (58). Importantly, expression of the proinflammatory activation (M1) marker, IL-1 $\beta$ , was also significantly decreased ( $P < 0.0001$ ) in  $TLR2$  null M $\phi$ s, as were numerous other inflammatory mediators and migration-associated genes (e.g. *CCR2*, receptor for the chemokine MCP-1). qRT PCR confirmed substantially lower levels of IL-1 $\beta$  ( $P < 0.05$ ;  $n = 9$ ) in independent samples of  $TLR2^{-/-}$  AF M $\phi$  (Fig. 7A). Analysis also revealed comparable levels of IL-6 ( $P = 0.4$ ;  $n = 7$ ) (Fig. 7B) in  $TLR2^{-/-}$  vs. B6 WT M $\phi$ s. Examination of M $\phi$  antiinflammatory activation (M2)

markers indicated that ARG 1 ( $P < 0.001$ ;  $n = 9$ ) was significantly reduced, whereas YM1 ( $P = 0.4$ ;  $n = 7$ ) expression was unaffected by TLR2 deficiency (Fig. 7, C and D). Notably, the effects of TLR2 deficiency were similar to those observed in AF M $\phi$ s from SP-A/D-deficient mice (Fig. 3, A and D).

## Discussion

In light of our previous findings, which suggested a role of SP-A produced by the fetal lung in inflammatory signaling leading to labor (14), it was of interest to functionally characterize the roles of SP-A, and the related C-type lectin, SP-D, in the timing of parturition in mice. To accomplish this, the timing of labor was assessed during first and second pregnancies in C57BL/6 WT mice and in mice homozygous null for *SP-A*, *SP-D*, and doubly deficient in *SP-A* and *SP-D*. *SP-A* $^{-/-}$ , *SP-D* $^{-/-}$ , and *SP-A* $^{-/-}$ /*D* $^{-/-}$  female mice bred to genetically-like males delivered normally at term during first pregnancies. However, during second pregnancies, *SP-A* and *SP-A/SP-D* null females bred to genetically like males manifested a delay in parturition timing. Although the delay did not reach statistical significance for the *SP-A* gene-targeted mice ( $P =$

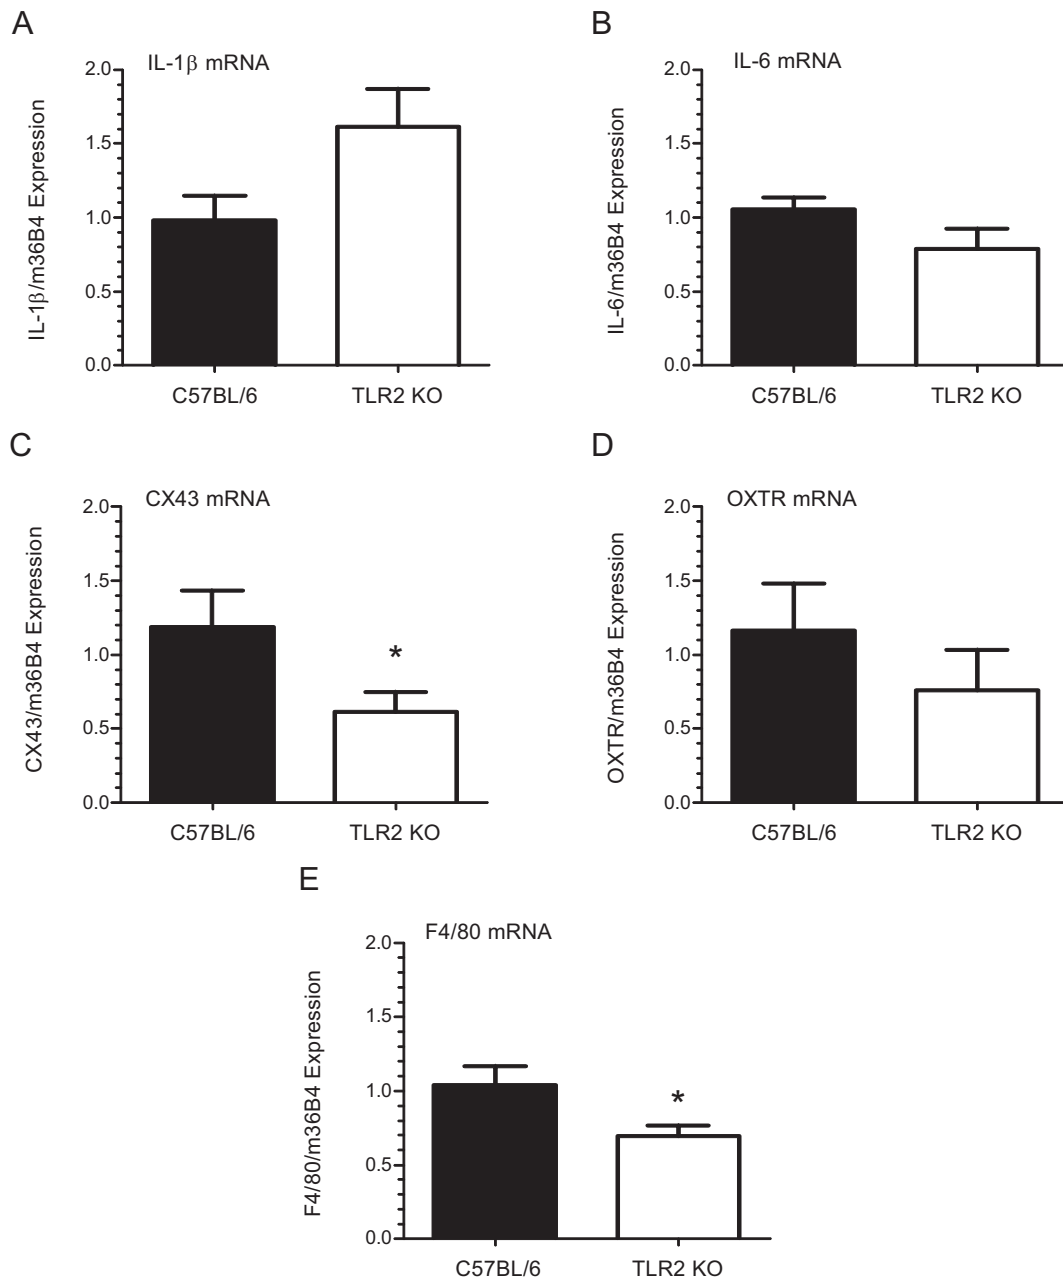

**FIG. 6.** TLR2-deficient mice exhibit dysregulated expression of inflammatory and contraction-associated genes in myometrium near term. Myometrial tissues were isolated from *TLR2*<sup>-/-</sup> and B6 WT pregnant females at 18.5 dpc and analyzed for IL-1 $\beta$ , IL-6, CX43, and OXTR mRNA expression by qRT-PCR. Values were normalized to m36B4 and calculated as fold change over B6 WT control using the  $\Delta\Delta C_t$  method. Analyses revealed a trend for up-regulated, albeit insignificant ( $P < 0.06$ ;  $n = 13$ ), expression of IL-1 $\beta$  mRNA (A) and similar expression levels of IL-6 (B) in *TLR2*<sup>-/-</sup> ( $P = 0.1$ ;  $n = 10$ ) mice compared with WT controls. Expression of the CAP gene *CX43* (C) was significantly decreased ( $P < 0.05$ ;  $n = 13$ ), whereas no difference in *OXTR* (D) ( $P = 0.33$ ;  $n = 10$ ) mRNA levels was detected. Significantly decreased levels of *F4/80* mRNA ( $P < 0.05$ ;  $n = 13$ ) (E) in myometrial tissues of *TLR2*<sup>-/-</sup> mice were observed relative to B6 WT mice. Values are expressed as the mean  $\pm$  SEM. Statistically significant differences were calculated using the Student's *t* test. \*,  $P < 0.05$ .

0.07), a similar delay in labor in the *SP-A/SP-D* null mice was highly significant. The pups born to both *SP-A* and *SP-A/SP-D* null mice were significantly heavier than WT, further indicating their advanced maturity at the time of birth. Because *SP-A* and *SP-D* genes lie only 60 kb apart on the mouse chromosome 14, to generate mice deficient in both *SP-A* and *SP-D*, it was necessary to sequentially

target these genes (41). Deletion of *SP-A* and *SP-D* resulted in decreased expression of the mannose binding lectin 1 (*MBL1*) gene, which lies between them (41). Interestingly, a polymorphism in the *SP-D* gene has been associated with spontaneous preterm birth in a Finnish cohort; however, none was noted in the genes for *SP-A* or *MBL1* in this population (59). We reasoned that the normal timing of

**TABLE 2.** Differentially expressed proinflammatory genes in AF Mφs from *TLR2*<sup>-/-</sup> mice relative to B6 WT

|    | Reference sequence | Gene symbol     | Function                                                   | Fold change | P value |
|----|--------------------|-----------------|------------------------------------------------------------|-------------|---------|
| 1  | Mm.424740          | <i>Ccl19</i>    | Potent leukocyte chemoattractant                           | -21.26      | 0.006   |
| 2  | Mm.1284            | <i>IL13</i>     | Mediator of allergic inflammation                          | -6.22       | 0.020   |
| 3  | Mm.59313           | <i>IL17b</i>    | Stimulates TNF and IL-1β from monocytic cell lines         | -5.53       | 0.005   |
| 4  | Mm.1715            | <i>Ltb</i>      | Immune system development, regulation, and inflammation    | -5.48       | 0.018   |
| 5  | Mm.8021            | <i>Ccr10</i>    | Regulates chemotaxis in various leukocytes                 | -5.41       | 0.097   |
| 6  | Mm.10116           | <i>Cxcl13</i>   | Stimulates Ca <sup>2+</sup> influx, B cell migration       | -4.89       | 0.003   |
| 7  | Mm.234466          | <i>Cxcr2</i>    | Binds KC and MIP-2                                         | -4.72       | 0.002   |
| 8  | Mm.1349            | <i>IL1r2</i>    | Decoy receptor inhibits IL-1α, IL-1β, and IL-1R type 1     | -4.59       | 0.013   |
| 9  | Mm.390241          | <i>Xcr1</i>     | Increases intracellular Ca <sup>2+</sup> levels            | -4.36       | 0.002   |
| 10 | Mm.64326           | <i>Cxcl15</i>   | Major mediator of the inflammatory response                | -4.19       | 0.000   |
| 11 | Mm.766             | <i>Cxcl9</i>    | T cell trafficking                                         | -3.71       | 0.001   |
| 12 | Mm.14302           | <i>Ccr5</i>     | Binds MCP-2, MIP-1α, and MIP-1β                            | -3.56       | 0.004   |
| 13 | Mm.288474          | <i>Spp1</i>     | Involved in IFNγ and IL-12 production                      | -3.56       | 0.011   |
| 14 | Mm.6272            | <i>Ccr2</i>     | Receptor for MCP-1, MCP-3, and MCP-4                       | -3.44       | 0.008   |
| 15 | Mm.42029           | <i>Ccl8</i>     | Chemoattractant for monocytes, lymphocytes, basophiles     | -3.24       | 0.016   |
| 16 | Mm.103794          | <i>IL20</i>     | Stimulates keratinocyte proliferation and TNF synthesis    | -3.21       | 0.020   |
| 17 | Mm.19131           | <i>C3</i>       | Activation of the complement system                        | -3.12       | 0.006   |
| 18 | Mm.57050           | <i>Ccr3</i>     | Binds eotaxin, eotaxin-3, MCP-3, MCP-4, RANTES, and MIP-1Δ | -3.08       | 0.007   |
| 19 | Mm.4392            | <i>IL15</i>     | Stimulates growth of T and NK cells                        | -2.99       | 0.001   |
| 20 | Mm.2856            | <i>IL6ra</i>    | Binds IL-6, may lead to acute phase reaction               | -2.89       | 0.025   |
| 21 | Mm.274927          | <i>Ccr1</i>     | Mediates recruitment of immune cells to inflammatory sites | -2.84       | 0.008   |
| 22 | Mm.347398          | <i>Bcl6</i>     | Transcriptional repressor, B cells                         | -2.75       | 0.019   |
| 23 | Mm.1410            | <i>IL18</i>     | Induces IFNγ production in T cells                         | -2.68       | 0.005   |
| 24 | Mm.222830          | <i>IL1b</i>     | Macrophage and T cell activation                           | -2.55       | 0.017   |
| 25 | Mm.262106          | <i>Itgam</i>    | Implicated in adhesive interactions                        | -2.54       | 0.013   |
| 26 | Mm.137             | <i>Ccl6</i>     | Chemotactic factor for T cells and monocytes               | -2.47       | 0.006   |
| 27 | Mm.235328          | <i>Tnfrsf1b</i> | Mediates numerous metabolic effects of TNF                 | -2.41       | 0.002   |
| 28 | Mm.24208           | <i>IL13ra1</i>  | Forms receptor complex with IL4RA                          | -2.33       | 0.004   |
| 29 | Mm.35814           | <i>IL11</i>     | Proliferation of stem cells                                | -2.33       | 0.032   |
| 30 | Mm.10137           | <i>IL16</i>     | chemoattractant for CD4+ cells, monocytes, and eosinophils | -2.22       | 0.004   |
| 31 | Mm.4861            | <i>Cd40lg</i>   | Regulates B cell function via CD40 binding                 | -2.18       | 0.008   |
| 32 | Mm.4154            | <i>IL10rb</i>   | Inhibits inflammatory cytokine synthesis in Mφ             | -2.03       | 0.000   |

F4/80<sup>+</sup> AF Mφs were isolated from *TLR2*-deficient and B6 WT mice at 18.5 dpc by FACSaria (BD Bioscience). RNA (500 ng) was reverse transcribed and expression of 84 inflammation associated genes was evaluated using SuperArray's mouse inflammatory RT<sup>2</sup> profiler PCR array plate. Data were analyzed using PCR array data analysis template (SABioscience). The comparative C<sub>t</sub> method (ΔΔC<sub>t</sub>) was used for quantification of gene expression. Genes down-regulated 2-fold or greater in *TLR2*<sup>-/-</sup> AF Mφs relative to WT are listed from largest to smallest differences. Samples were analyzed in duplicate. Statistical significance was determined by the Student's *t* test.

parturition observed in the *SP-A* deficient and the *SP-A/D* doubly deficient mice in first pregnancies is potentially due to multifactorial regulation of parturition timing and the dominant role of uterine stretch as a signal for parturition (12, 60, 61) in the nonadapted uterus. However, in subsequent pregnancies, the prior mechanical adaptation of the uterus to stretch, resulting in increased elasticity (62) may allow other signals (*e.g.* surfactant proteins) to play a more significant signaling role.

Up-regulation of cytokine production, NF-κB activation, and prostaglandin signaling pathways within the myometrium are proposed to serve an important role in the initiation of parturition at term. Similarly, during pathogen-induced preterm labor, robust inflammatory cytokine production in fetal and maternal reproductive tissues promote the expression of secondary mediators responsible for enhancing myometrial contractile activity and birth (2, 63). Our finding in this study that *SP-A/SP-D* doubly deficient mice express sig-

nificantly lower levels of IL-1β and IL-6 in myometrium suggests that interaction of SP-A and SP-D with their cognate receptor(s) promote the induction of proinflammatory cytokines leading to parturition.

IL-1β and IL-6 promote increased myometrial contractility by direct activation of NF-κB, COX-2 and prostaglandin signaling pathways (64–66). IL-1β is highly expressed in amnion, chorion, isolated decidua, and myometrium, and IL-1β levels are increased in AF and in AF Mφs near term (9, 11, 14, 67, 68). The finding that mice deficient for the IL-1 receptor (type 1) apparently deliver normally (69) is likely due to functional redundancy of parturition-associated cytokines because administration of IL-1 to nonhuman primates and rodents triggers preterm labor (70, 71). Although it was previously reported that IL-6 was not necessary or required for bacterially induced preterm labor in mice (72), Robertson *et al.* (73) observed a delay in labor at term of approximately 24 h in IL-6-deficient mice. Interestingly, this delay was

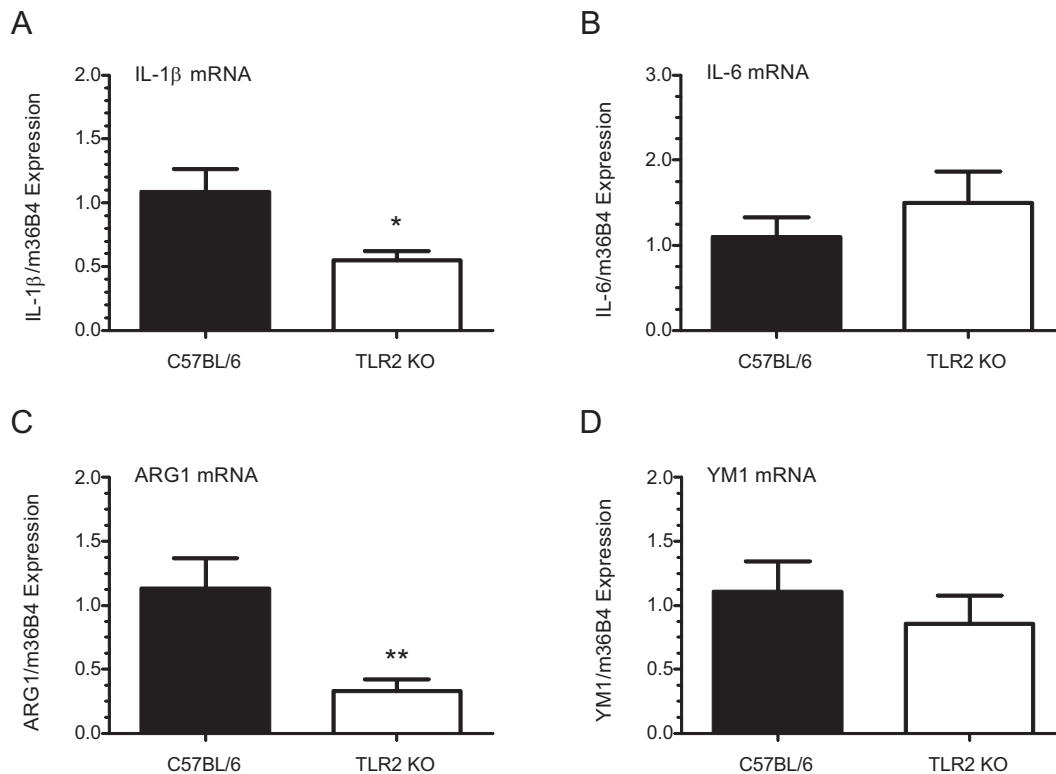

**FIG. 7.** Amniotic fluid Mφs isolated from TLR-2-deficient mice exhibit decreased expression of M1 and M2 activation markers. F4/80<sup>+</sup> AF Mφs isolated from TLR2<sup>-/-</sup> and WT B6 mice were isolated by FACS Aria (BD Bioscience) at 18.5 dpc. Pooled Mφ mRNA (500 ng) from each timed-pregnant mouse was reverse transcribed and the expression of IL-1β and IL-6 was analyzed by qRT-PCR. Expression was normalized to m36B4 and calculated as fold change over WT control using the  $\Delta\Delta C_t$  method. Data indicate decreased levels of the classical activation (M1) marker IL-1β (A) ( $P < 0.05$ ;  $n = 9$ ) and comparable levels of IL-6 (B) ( $P = 0.4$ ;  $n = 7$ ) in TLR2<sup>-/-</sup> AF Mφ compared with WT. Analysis of alternative activation (M2) markers revealed significantly lower levels of ARG1 (C) mRNA ( $P < 0.001$ ;  $n = 9$ ) in TLR2<sup>-/-</sup> Mφs, whereas YM1 (D) ( $P = 0.4$ ;  $n = 7$ ) expression was similar to WT. Values are the mean  $\pm$  SEM. Statistically significant differences were analyzed by the Student's *t* test. \*,  $P < 0.05$ , \*\*,  $P < 0.001$ .

associated with a 24 h latency in up-regulation of COX-2 and OXTR mRNA expression in myometrial tissues (73). Moreover, chronic administration of IL-6 restored normal parturition in these mice. Although IL-6 infusion did not alter maternal progesterone levels, pronounced changes in the expression of genes associated with uterine contractile activity were observed (73). The reduced levels of IL-1β and IL-6 mRNA in myometrium of SP-A/D<sup>-/-</sup> mice at 18.5 dpc, compared with WT, observed in the present study, were associated with a pronounced reduction in expression of the CAP genes, OXTR and CX43. This serves to underscore the critical role of SP-A and SP-D early in the inflammatory signaling pathway and in the subsequent activation of CAP genes leading to parturition. Thus, the delay in labor in the SP-A/SP-D null mice is likely attributed to the interruption of the inflammatory cascade at the level of binding of these pulmonary collectins to their cognate receptors.

Our previous studies suggested that augmented production of SP-A by fetal lung serves as a hormonal signal for the initiation of labor that is transmitted to the maternal uterus by fetal AF Mφs (14). We observed that the

gestational increase in SP-A secretion by mouse fetal lung was associated with increased expression of IL-1β in AF Mφs and increased Mφ infiltration, IL-1β expression, and NF-κB activation in the maternal uterus (14). Moreover, SP-A treatment of AF Mφs caused an up-regulation of IL-1β, a proinflammatory marker. In the present study, we found that AF Mφs surrounding SP-A/D-deficient fetuses manifested significantly decreased expression of the Mφ proinflammatory M1 activation marker, IL-1β, and the antiinflammatory M2 activation markers, ARG1 and YM1. These findings are in accord with a growing body of evidence that SP-A and SP-D proteins act as modulators of both proinflammatory and antiinflammatory immune cell function (74).

Due to the similar inflammatory hallmarks of term and preterm labor and the association of preterm labor with underlying bacterial infection (13), a role for TLR2 and/or TLR4 in spontaneous labor at term has been postulated. As mentioned, SP-A, and SP-D are known ligands for TLR2 and TLR4. During ontogeny in mice, TLR2 and TLR4 mRNA levels within the fetal lung increase approximately 7-fold between 15 dpc and term (75). Whether



these increases are due to enhanced expression in lung cells or in resident M $\phi$ s was not determined. Our present findings reveal that expression in TLR2 and TLR4/MD-2 was up-regulated between 15.5 and 18.5 dpc in AF M $\phi$ s, which likely arise from the fetal lung. These findings are consistent with studies demonstrating that SP-A selectively increases surface expression of TLR2 in human monocyte-derived M $\phi$ s (54). Importantly, in the present study, we also observed a significant delay in the timing of parturition in mice deficient in TLR2 during first pregnancies. TLR2-deficient mothers with delayed labor delivered significantly larger pups, supporting the observation of protracted gestation length. Scatter plots of data for parturition timing in TLR2-deficient mice suggest a perturbation in parturition timing and further emphasize the existence of compensatory mechanisms (e.g. uterine stretch) during first pregnancies.

The finding of significantly lower levels of SP-A and SP-D expression in the lungs of *TLR2*<sup>-/-</sup> fetal mice, supports the concept that M $\phi$ -type II cell interactions play an important role in lung surfactant production and in parturition timing. The intraamniotic administration of endotoxin (76) or IL-1 (77) to pregnant rabbits was previously observed to increase fetal lung expression of SP-A and to induce preterm birth. A similar induction of SP-A expression in fetal lung was observed after the intraamniotic administration of endotoxin to fetal sheep (78). Moreover, the incidence of respiratory distress syndrome was reported to be decreased in infants born prematurely to women with chorioamnionitis (79), suggesting a role for increased AF cytokines in fetal lung maturation and surfactant synthesis. Notably, the finding that LPS treatment increased SP-A gene expression in A549 human lung adenocarcinoma cells through TLR2-mediated sequential activation of the MYD88-MAPK kinase-4-c-Jun N-terminal kinase 1-activator protein-1 pathway, further suggests a role for TLR2 signaling in the regulation of SP-A expression (80). Thus, in the setting of sterile inflammation, as that found within the AF compartment near term, SP-A, and SP-D, and TLR2 may function in a positive feed-forward loop, resulting in further increases in SP-A and SP-D and enhanced M $\phi$  activation. Interruption of this pathway in TLR2-deficient mice would therefore be expected to result in decreased expression of SP-A and SP-D by the fetal lungs.

In TLR2-deficient mice, IL-1 $\beta$  and IL-6 were expressed in myometrial tissues at levels similar to WT. This is likely due the fact that IL-1 and IL-6 are not components of the TLR signaling pathway. The lack of an effect of TLR2 deficiency on OXTR expression may reflect the dominant role of uterine stretch in activating expression of this CAP gene (12) during first pregnancies. However, the signifi-

cantly reduced levels of the M $\phi$  marker, F4/80, and of CX43 expression in myometrium of *TLR2*<sup>-/-</sup> mice indicates that M $\phi$  migration and gap junction formation were disrupted by TLR2 deficiency. The reduced expression of CX43 may contribute to the prolonged gestation in *TLR2*<sup>-/-</sup> mice because conditional deletion of myometrial CX43 was observed to significantly delay labor (81). Indeed, gap junction formation in human airway and intestinal epithelial cell lines was reported to be mediated by TLR2-dependent transcriptional regulation and post-translational modification of CX43 (82, 83). The significantly decreased levels of the M $\phi$  marker, F4/80, in myometrium of TLR2-deficient mice indicates that M $\phi$  migration also was markedly affected. These findings are in accord with the recent report that TLR2 activation is necessary for SP-A-stimulated chemotaxis of murine macrophages (84).

We therefore postulate that the delay in labor observed in TLR2-deficient mice might be attributed, in part, to a disruption in AF M $\phi$  activation. SuperArray analysis of F4/80<sup>+</sup> AF M $\phi$ s isolated from *TLR2*<sup>-/-</sup> mice (18.5 dpc) supported this notion in light of the large number of proinflammatory and migration-associated genes that were strongly down-regulated in TLR2-deficient AF M $\phi$ s, compared with WT at 18.5 dpc. Thus, TLR2 deficiency prevented the up-regulation of the proinflammatory and migratory genes in AF M $\phi$  near term, which may contribute to the observed decrease in levels of F4/80 in the myometrium. Importantly, the altered M1 and M2 molecular profile observed in TLR2-deficient mice was mirrored in *SP-A/D*<sup>-/-</sup> AF M $\phi$ s because they too expressed significantly reduced levels of these same markers, in addition to YM1, at 18.5 dpc. Together these findings suggest that SP-A and TLR2 are essential for normal AF M $\phi$  activation and potentially for subsequent M $\phi$  infiltration of the myometrium at term.

In conclusion, our findings suggest that the signals leading to the initiation of labor are multifactorial and their relative impacts may be dependent on parity. Whereas in the first pregnancy, uterine stretch may function as the primary and overriding signal, during subsequent pregnancies, signals, such as SP-A and SP-D acting via TLRs may play a more critical role. Our data further indicate that interaction of SP-A and SP-D with TLR2 may cause activation of the AF M $\phi$  population, which, in turn, contributes to the inflammatory cascade within the myometrium that culminates in increased CAP gene expression leading to labor at term. Importantly, these findings may provide insight into the novel therapeutic strategies for the prevention of preterm birth.

## Acknowledgments

We thank Dr. Robert Hammer (University of Texas Southwestern Medical Center) for expert advice, and Mr. Ryan Norcross and Ms. Jo Smith for their assistance in this project.

Address all correspondence and requests for reprints to: Carole R. Mendelson, Ph.D., Department of Biochemistry, University of Texas Southwestern Medical Center, 5323 Harry Hines Boulevard, Dallas, Texas 75390-9038. E-mail: carole.mendelson@utsouthwestern.edu.

This research was funded, in part, by National Institutes of Health Grants R01-HL050022, P01-HD011149 and Prematurity Research Grant No. 21-FY11-30 from the March of Dimes Foundation.

Disclosure Summary: The authors have nothing to disclose.

## References

- Blencowe H, Cousens S, Oestergaard MZ, Chou D, Moller AB, Narwal R, Adler A, Vera Garcia C, Rohde S, Say L, Lawn JE 2012 National, regional, and worldwide estimates of preterm birth rates in the year 2010 with time trends since 1990 for selected countries: a systematic analysis and implications. *Lancet* 379:2162–2172
- Romero R, Mazor M, Wu YK, Sirtori M, Oyarzun E, Mitchell MD, Hobbins JC 1988 Infection in the pathogenesis of preterm labor. *Semin Perinatol* 12:262–279
- Green NS, Damus K, Simpson JL, Iams J, Reece EA, Hobel CJ, Merkatz IR, Greene MF, Schwarz RH 2005 Research agenda for preterm birth: recommendations from the March of Dimes. *Am J Obstet Gynecol* 193:626–635
- Goldenberg RL, Culhane JF, Iams JD, Romero R 2008 Epidemiology and causes of preterm birth. *Lancet* 371:75–84
- Hirsch E, Wang H 2005 The molecular pathophysiology of bacterially induced preterm labor: insights from the murine model. *J Soc Gynecol Investig* 12:145–155
- Elovitz MA, Mrinalini C 2004 Animal models of preterm birth. *Trends Endocrinol Metab* 15:479–487
- Challis JR, Lockwood CJ, Myatt L, Norman JE, Strauss 3rd JF, Petraglia F 2009 Inflammation and pregnancy. *Reprod Sci* 16:206–215
- Mendelson CR 2009 Minireview: fetal-maternal hormonal signaling in pregnancy and labor. *Mol Endocrinol* 23:947–954
- Cox SM, Casey ML, MacDonald PC 1997 Accumulation of interleukin-1 $\beta$  and interleukin-6 in amniotic fluid: a sequela of labour at term and preterm. *Hum Reprod Update* 3:517–527
- Thomson AJ, Telfer JF, Young A, Campbell S, Stewart CJ, Cameron IT, Greer IA, Norman JE 1999 Leukocytes infiltrate the myometrium during human parturition: further evidence that labour is an inflammatory process. *Hum Reprod* 14:229–236
- Osman I, Young A, Ledingham MA, Thomson AJ, Jordan F, Greer IA, Norman JE 2003 Leukocyte density and pro-inflammatory cytokine expression in human fetal membranes, decidua, cervix and myometrium before and during labour at term. *Mol Hum Reprod* 9:41–45
- Shynlova O, Tsui P, Jaffer S, Lye SJ 2009 Integration of endocrine and mechanical signals in the regulation of myometrial functions during pregnancy and labour. *Eur J Obstet Gynecol Reprod Biol* 144(Suppl 1):S2–S10
- Romero R, Espinoza J, Goncalves LF, Kusanovic JP, Friel L, Hassan S 2007 The role of inflammation and infection in preterm birth. *Semin Reprod Med* 25:21–39
- Condon JC, Jeyasuria P, Faust JM, Mendelson CR 2004 Surfactant protein secreted by the maturing mouse fetal lung acts as a hormone that signals the initiation of parturition. *Proc Natl Acad Sci USA* 101:4978–4983
- López Bernal A, Newman GE, Phizackerley PJ, Turnbull AC 1988 Surfactant stimulates prostaglandin E production in human amnion. *Br J Obstet Gynaecol* 95:1013–1017
- Mendelson CR, Boggaram V 1990 Hormonal and developmental regulation of pulmonary surfactant synthesis in fetal lung. *Baillieres Clin Endocrinol Metab* 4:351–378
- Whitsett JA, Weaver TE 2002 Hydrophobic surfactant proteins in lung function and disease. *N Engl J Med* 347:2141–2148
- Hawgood S, Shiffer K 1991 Structures and properties of the surfactant-associated proteins. *Annu Rev Physiol* 53:375–394
- Hawgood S, Poulain FR 2001 The pulmonary collectins and surfactant metabolism. *Annu Rev Physiol* 63:495–519
- Snyder JM, Kwun JE, O'Brien JA, Rosenfeld CR, Odom MJ 1988 The concentration of the 35-kDa surfactant apoprotein in amniotic fluid from normal and diabetic pregnancies. *Pediatr Res* 24:728–734
- Mendelson CR, Condon JC 2005 New insights into the molecular endocrinology of parturition. *J Steroid Biochem Mol Biol* 93:113–119
- Drickamer K 1999 C-type lectin-like domains. *Curr Opin Struct Biol* 9:585–590
- Seaton BA, Crouch EC, McCormack FX, Head JF, Hartshorn KL, Mendelsohn R 2010 Review: structural determinants of pattern recognition by lung collectins. *Innate Immun* 16:143–150
- Kuroki Y, Takahashi M, Nishitani C 2007 Pulmonary collectins in innate immunity of the lung. *Cell Microbiol* 9:1871–1879
- Crouch E, Wright JR 2001 Surfactant proteins A and D and pulmonary host defense. *Annu Rev Physiol* 63:521–554
- Kingma PS, Whitsett JA 2006 In defense of the lung: surfactant protein A and surfactant protein D. *Curr Opin Pharmacol* 6:277–283
- Wright JR 2005 Immunoregulatory functions of surfactant proteins. *Nat Rev Immunol* 5:58–68
- Guillot L, Balloy V, McCormack FX, Golenbock DT, Chignard M, Si-Tahar M 2002 Cutting edge: the immunostimulatory activity of the lung surfactant protein-A involves Toll-like receptor 4. *J Immunol* 168:5989–5992
- Murakami S, Iwaki D, Mitsuzawa H, Sano H, Takahashi H, Voelker DR, Akino T, Kuroki Y 2002 Surfactant protein A inhibits peptidoglycan-induced tumor necrosis factor- $\alpha$  secretion in U937 cells and alveolar macrophages by direct interaction with toll-like receptor 2. *J Biol Chem* 277:6830–6837
- Gardai SJ, Xiao YQ, Dickinson M, Nick JA, Voelker DR, Greene KE, Henson PM 2003 By binding SIRP $\alpha$  or calreticulin/CD91, lung collectins act as dual function surveillance molecules to suppress or enhance inflammation. *Cell* 115:13–23
- Sano H, Kuroki Y 2005 The lung collectins, SP-A and SP-D, modulate pulmonary innate immunity. *Mol Immunol* 42:279–287
- Mukherjee S, Giamberardino C, Thomas J, Evans K, Goto H, Ledford JG, Hsia B, Pastva AM, Wright JR 2012 Surfactant protein A integrates activation signal strength to differentially modulate T cell proliferation. *J Immunol* 188:957–967
- Sato M, Sano H, Iwaki D, Kudo K, Konishi M, Takahashi H, Takahashi T, Imaizumi H, Asai Y, Kuroki Y 2003 Direct binding of Toll-like receptor 2 to zymosan, and zymosan-induced NF- $\kappa$ B activation and TNF- $\alpha$  secretion are down-regulated by lung collectin surfactant protein A. *J Immunol* 171:417–425
- Ohya M, Nishitani C, Sano H, Yamada C, Mitsuzawa H, Shimizu T, Saito T, Smith K, Crouch E, Kuroki Y 2006 Human pulmonary surfactant protein D binds the extracellular domains of Toll-like receptors 2 and 4 through the carbohydrate recognition domain by a mechanism different from its binding to phosphatidylinositol and lipopolysaccharide. *Biochemistry* 45:8657–8664

35. Tsan MF, Gao B 2004 Endogenous ligands of Toll-like receptors. *J Leukoc Biol* 76:514–519
36. Yamada C, Sano H, Shimizu T, Mitsuzawa H, Nishitani C, Himi T, Kuroki Y 2006 Surfactant protein A directly interacts with TLR4 and MD-2 and regulates inflammatory cellular response. Importance of supratrimeric oligomerization. *J Biol Chem* 281:21771–21780
37. Janeway Jr CA, Medzhitov R 2002 Innate immune recognition. *Annu Rev Immunol* 20:197–216
38. Medzhitov R 2001 Toll-like receptors and innate immunity. *Nat Rev Immunol* 1:135–145
39. Li G, Siddiqui J, Hendry M, Akiyama J, Edmondson J, Brown C, Allen L, Levitt S, Poulain F, Hawgood S 2002 Surfactant protein A-deficient mice display an exaggerated early inflammatory response to a  $\beta$ -resistant strain of influenza A virus. *Am J Respir Cell Mol Biol* 26:277–282
40. Botas C, Poulain F, Akiyama J, Brown C, Allen L, Goerke J, Clements J, Carlson E, Gillespie AM, Epstein C, Hawgood S 1998 Altered surfactant homeostasis and alveolar type II cell morphology in mice lacking surfactant protein D. *Proc Natl Acad Sci USA* 95:11869–11874
41. Hawgood S, Ochs M, Jung A, Akiyama J, Allen L, Brown C, Edmondson J, Levitt S, Carlson E, Gillespie AM, Villar A, Epstein CJ, Poulain FR 2002 Sequential targeted deficiency of SP-A and -D leads to progressive alveolar lipoproteinosis and emphysema. *Am J Physiol Lung Cell Mol Physiol* 283:L1002–L1010
42. Chomczynski P, Sacchi N 1987 Single-step method of RNA isolation by acid guanidinium thiocyanate-phenol-chloroform extraction. *Anal Biochem* 162:156–159
43. Livak KJ, Schmittgen TD 2001 Analysis of relative gene expression data using real-time quantitative PCR and the  $2^{-\Delta\Delta C(T)}$  method. *Methods* 25:402–408
44. Murray SA, Morgan JL, Kane C, Sharma Y, Heffner CS, Lake J, Donahue LR 2010 Mouse gestation length is genetically determined. *PLoS One* 5:e12418
45. Yan X, Sun M, Gibb W 2002 Localization of nuclear factor- $\kappa$ B (NF- $\kappa$ B) and inhibitory factor- $\kappa$ B (I $\kappa$ B) in human fetal membranes and decidua at term and preterm delivery. *Placenta* 23:288–293
46. Chow L, Lye SJ 1994 Expression of the gap junction protein connexin-43 is increased in the human myometrium toward term and with the onset of labor. *Am J Obstet Gynecol* 170:788–795
47. Ou CW, Chen ZQ, Qi S, Lye SJ 1998 Increased expression of the rat myometrial oxytocin receptor messenger ribonucleic acid during labor requires both mechanical and hormonal signals. *Biol Reprod* 59:1055–1061
48. Renthal NE, Chen CC, Williams KC, Gerard RD, Prange-Kiel J, Mendelson CR 2010 miR-200 family and targets, ZEB1 and ZEB2, modulate uterine quiescence and contractility during pregnancy and labor. *Proc Natl Acad Sci U S A* 107:20828–20833
49. Takeuchi O, Hoshino K, Kawai T, Sanjo H, Takada H, Ogawa T, Takeda K, Akira S 1999 Differential roles of TLR2 and TLR4 in recognition of gram-negative and Gram-positive bacterial cell wall components. *Immunity* 11:443–451
50. Poltorak A, He X, Smirnova I, Liu MY, Van Huffel C, Du X, Birdwell D, Alejos E, Silva M, Galanos C, Freudenberg M, Ricciardi-Castagnoli P, Layton B, Beutler B 1998 Defective LPS signaling in C3H/HeJ and C57BL/10ScCr mice: mutations in *Tlr4* gene. *Science* 282:2085–2088
51. Canavan TP, Simhan HN 2007 Innate immune function of the human decidua cell at the maternal-fetal interface. *J Reprod Immunol* 74:46–52
52. Youssef RE, Ledingham MA, Bollapragada SS, O’Gorman N, Jordan F, Young A, Norman JE 2009 The role of toll-like receptors (TLR-2 and -4) and triggering receptor expressed on myeloid cells 1 (TREM-1) in human term and preterm labor. *Reprod Sci* 16:843–856
53. O’Brien M, Morrison JJ, Smith TJ 2008 Upregulation of PSCDBP, TLR2, TWIST1, FLJ35382, EDNRB, and RGS12 gene expression in human myometrium at labor. *Reprod Sci* 15:382–393
54. Henning LN, Azad AK, Parsa KV, Crowther JE, Tridandapani S, Schlesinger LS 2008 Pulmonary surfactant protein A regulates TLR expression and activity in human macrophages. *J Immunol* 180:7847–7858
55. Luther SA, Bidgol A, Hargreaves DC, Schmidt A, Xu Y, Paniyadi J, Matloubian M, Cyster JG 2002 Differing activities of homeostatic chemokines CCL19, CCL21, and CXCL12 in lymphocyte and dendritic cell recruitment and lymphoid neogenesis. *J Immunol* 169:424–433
56. Hershey GK 2003 IL-13 receptors and signaling pathways: an evolving web. *J Allergy Clin Immunol* 111:677–690; quiz 691
57. Locksley RM, Killeen N, Lenardo MJ 2001 The TNF and TNF receptor superfamilies: integrating mammalian biology. *Cell* 104:487–501
58. Homey B, Alenius H, Müller A, Soto H, Bowman EP, Yuan W, McEvoy L, Lauerma AI, Assmann T, Bünemann E, Lehto M, Wolff H, Yen D, Marxhausen H, To W, Sedgwick J, Ruzicka T, Lehmann P, Zlotnik A 2002 CCL27–CCR10 interactions regulate T cell-mediated skin inflammation. *Nat Med* 8:157–165
59. Karjalainen MK, Huusko JM, Tuohimaa A, Luukkonen A, Haataja R, Hallman M 2012 A study of collectin genes in spontaneous preterm birth reveals an association with a common surfactant protein D gene polymorphism. *Pediatr Res* 71:93–99
60. Shynlova O, Tsui P, Dorogin A, Lye SJ 2008 Monocyte chemoattractant protein-1 (CCL-2) integrates mechanical and endocrine signals that mediate term and preterm labor. *J Immunol* 181:1470–1479
61. Sooranna SR, Lee Y, Kim LU, Mohan AR, Bennett PR, Johnson MR 2004 Mechanical stretch activates type 2 cyclooxygenase via activator protein-1 transcription factor in human myometrial cells. *Mol Hum Reprod* 10:109–113
62. Wu X, Morgan KG, Jones CJ, Tribe RM, Taggart MJ 2008 Myometrial mechanoadaptation during pregnancy: implications for smooth muscle plasticity and remodelling. *J Cell Mol Med* 12:1360–1373
63. Keelan JA, Blumenstein M, Helliwell RJ, Sato TA, Marvin KW, Mitchell MD 2003 Cytokines, prostaglandins and parturition—a review. *Placenta* 24(Suppl A):S33–S46
64. Hardy DB, Janowski BA, Corey DR, Mendelson CR 2006 Progesterone receptor (PR) plays a major anti-inflammatory role in human myometrial cells by antagonism of NF- $\kappa$ B activation of cyclooxygenase 2 (COX-2) expression. *Mol Endocrinol* 20:2724–2733
65. Dong YL, Gangula PR, Fang L, Yallampalli C 1996 Differential expression of cyclooxygenase-1 and -2 proteins in rat uterus and cervix during the estrous cycle, pregnancy, labor and in myometrial cells. *Prostaglandins* 52:13–34
66. Allport VC, Pieber D, Slater DM, Newton R, White JO, Bennett PR 2001 Human labour is associated with nuclear factor- $\kappa$ B activity which mediates cyclo-oxygenase-2 expression and is involved with the ‘functional progesterone withdrawal.’ *Mol Hum Reprod* 7:581–586
67. Dudley DJ, Collmer D, Mitchell MD, Trautman MS 1996 Inflammatory cytokine mRNA in human gestational tissues: implications for term and preterm labor. *J Soc Gynecol Investig* 3:328–335
68. Romero R, Parvizi ST, Oyarzun E, Mazor M, Wu YK, Avila C, Athanassiadis AP, Mitchell MD 1990 Amniotic fluid interleukin-1 in spontaneous labor at term. *J Reprod Med* 35:235–238
69. Abbondanzo SJ, Cullinan EB, McIntyre K, Labow MA, Stewart CL 1996 Reproduction in mice lacking a functional type 1 IL-1 receptor. *Endocrinology* 137:3598–3601
70. Sadowsky DW, Adams KM, Gravett MG, Witkin SS, Novy MJ 2006 Preterm labor is induced by intraamniotic infusions of interleukin-1 $\beta$  and tumor necrosis factor- $\alpha$  but not by interleukin-6 or interleukin-8 in a nonhuman primate model. *Am J Obstet Gynecol* 195:1578–1589

71. **Romero R, Mazor M, Tartakovsky B** 1991 Systemic administration of interleukin-1 induces preterm parturition in mice. *Am J Obstet Gynecol* 165:969–971
72. **Yoshimura K, Hirsch E** 2003 Interleukin-6 is neither necessary nor sufficient for preterm labor in a murine infection model. *J Soc Gynecol Invest* 10:423–427
73. **Robertson SA, Christiaens I, Dorian CL, Zaragoza DB, Care AS, Banks AM, Olson DM** 2010 Interleukin-6 is an essential determinant of on-time parturition in the mouse. *Endocrinology* 151:3996–4006
74. **Nayak A, Dodagatta-Marri E, Tsolaki AG, Kishore U** 2012 An insight into the diverse roles of surfactant proteins, SP-A and SP-D in innate and adaptive immunity. *Front Immunol* 3:131
75. **Harju K, Glumoff V, Hallman M** 2001 Ontogeny of Toll-like receptors Tlr2 and Tlr4 in mice. *Pediatr Res* 49:81–83
76. **Bry K, Lappalainen U** 2001 Intra-amniotic endotoxin accelerates lung maturation in fetal rabbits. *Acta Paediatr* 90:74–80
77. **Bry K, Lappalainen U, Hallman M** 1997 Intraamniotic interleukin-1 accelerates surfactant protein synthesis in fetal rabbits and improves lung stability after premature birth. *J Clin Invest* 99:2992–2999
78. **Jobe AH, Newnham JP, Willet KE, Sly P, Ervin MG, Bachurski C, Possmayer F, Hallman M, Ikegami M** 2000 Effects of antenatal endotoxin and glucocorticoids on the lungs of preterm lambs. *Am J Obstet Gynecol* 182:401–408
79. **Tsuda H, Takahashi Y, Iwagaki S, Kawabata I, Hayakawa H, Kotani T, Shibata K, Kikkawa F** 2010 Intra-amniotic infection increases amniotic lamellar body count before 34 weeks of gestation. *J Matern Fetal Neonatal Med* 23:1230–1236
80. **Chuang CY, Chen TG, Tai YT, Chen TL, Lin YH, Tsai CH, Chen RM** 2011 Toll-like receptor 2-mediated sequential activation of MyD88 and MAPKs contributes to lipopolysaccharide-induced SP-A gene expression in human alveolar epithelial cells. *Immunobiology* 216:707–714
81. **Döring B, Shynlova O, Tsui P, Eckardt D, Janssen-Bienhold U, Hofmann F, Feil S, Feil R, Lye SJ, Willecke K** 2006 Ablation of connexin43 in uterine smooth muscle cells of the mouse causes delayed parturition. *J Cell Sci* 119:1715–1722
82. **Martin FJ, Prince AS** 2008 TLR2 regulates gap junction intercellular communication in airway cells. *J Immunol* 180:4986–4993
83. **Ey B, Eyking A, Gerken G, Podolsky DK, Cario E** 2009 TLR2 mediates gap junctional intercellular communication through connexin-43 in intestinal epithelial barrier injury. *J Biol Chem* 284:22332–22343
84. **Foley JP, Lam D, Jiang H, Liao J, Cheong N, McDevitt TM, Zaman A, Wright JR, Savani RC** 2012 TLR2, TGF $\beta$ , hyaluronan and RHAMM are required for surfactant protein A-stimulated macrophage chemotaxis. *J Biol Chem* 287:37406–37419

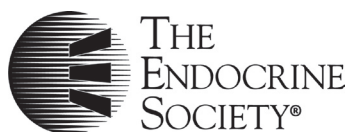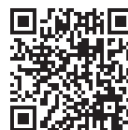

Visit our new website to find  
all your **endocrine self-assessment needs** in one place.

[www.endoselfassessment.org](http://www.endoselfassessment.org)
